# Supplementary material for: A covalent modification strategy for di-alkyne tagged metal–organic frameworks to access efficient heterogeneous catalysts toward C–C bond formation
Source: Royal Society of Chemistry journal article supplement (doi:10.1039/d1nj04982h), 2021-12-15
Supplement: d1nj04982h1.pdf [file d1nj04982h1.pdf]

## Supporting Information

Qianqian Liang,<sup>‡a</sup> Hua Cheng,<sup>‡a</sup> Chengwen Li,<sup>d</sup> Liangmin Ning<sup>\*b</sup> and Liming Shao<sup>\*a,c</sup>

<sup>a</sup> School of Pharmacy, Fudan University, 826 Zhangheng Road, Zhangjiang Hi-tech Park, Pudong, Shanghai, 201203, China.

<sup>b</sup> College of Chemical and Biological Engineering, Shandong University of Science and Technology, Qingdao, 266590, China.

<sup>c</sup> State Key Laboratory of Medical Neurobiology, Fudan University, 138 Yixueyuan Road, Shanghai, 200032, China.

<sup>d</sup> DezhouDeyao Pharmaceutical Co, Ltd, No.6000 East Dongfanghong Road, Shandong, 253084, China.

<sup>‡</sup> These authors contributed equally to this study.

<sup>\*</sup> Corresponding author : Liming Shao Ph.D. at limingshao@fudan.edu.cn and Liangmin Ning Ph.D. at 791695627@qq.com

**Table S1.** Knoevenagel condensation reaction between benzaldehyde and malononitrile using mixing catalyst.

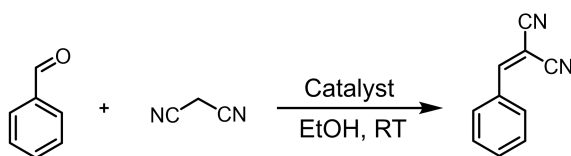

| Entry          | Catalyst                                                                         | Time (min) | Conversion (%) |
|----------------|----------------------------------------------------------------------------------|------------|----------------|
| 1 <sup>a</sup> | UiO-66-(alkyne) <sub>2</sub> +Co(PPh <sub>3</sub> ) <sub>2</sub> Cl <sub>2</sub> | 10         | 6.5            |
| 2 <sup>b</sup> | UiO-66+Co(PPh <sub>3</sub> ) <sub>2</sub> Cl <sub>2</sub>                        | 10         | 16.7           |

<sup>a</sup> The simple mixing of nearly equivalent UiO-66-(alkyne)<sub>2</sub> (7 mg) and Co(PPh<sub>3</sub>)<sub>2</sub>Cl<sub>2</sub> (3 mg) according to UiO-66-(alkyne-Co)<sub>2</sub>.

<sup>b</sup> The simple mixing of nearly equivalent UiO-66-(alkyne)<sub>2</sub> (7 mg) and Co(PPh<sub>3</sub>)<sub>2</sub>Cl<sub>2</sub> (3 mg) according to UiO-66-(alkyne-Co)<sub>2</sub>.

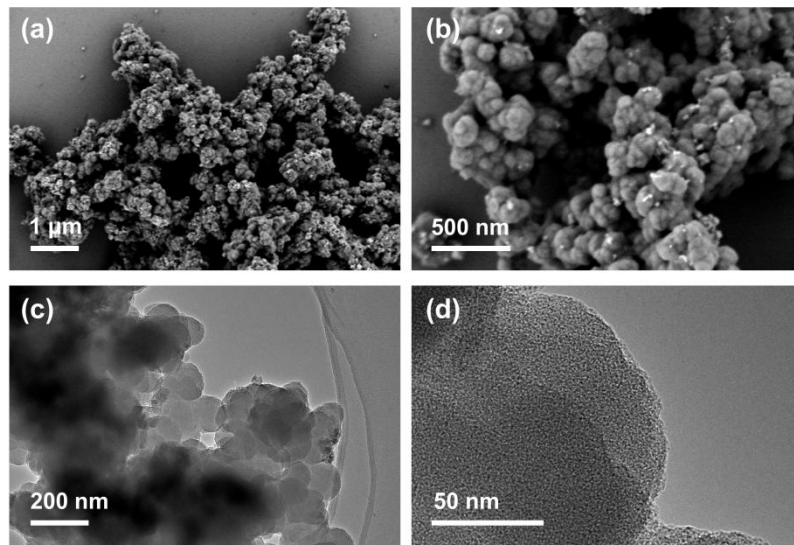

**Fig. S1** SEM (a-b) and TEM (c-d) images of UiO-66-(alkyne-Co)<sub>2</sub>-recycle.

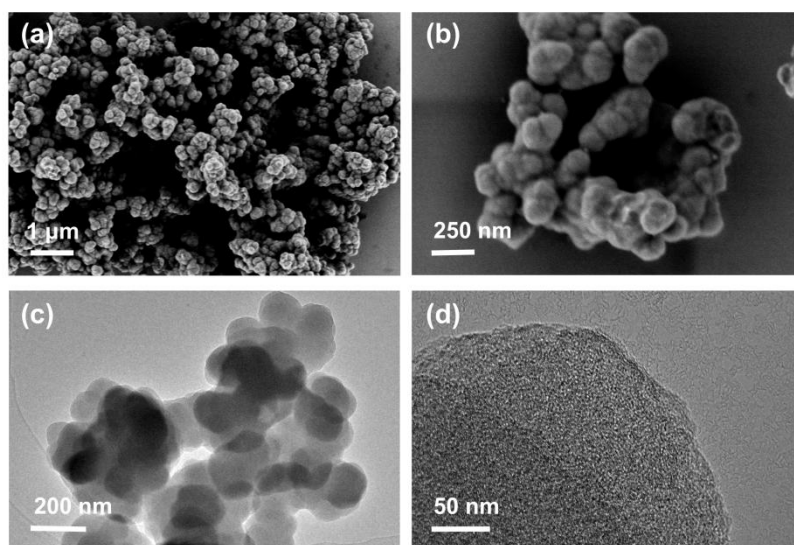

**Fig. S2** SEM (a-b) and TEM (c-d) images of UiO-66.

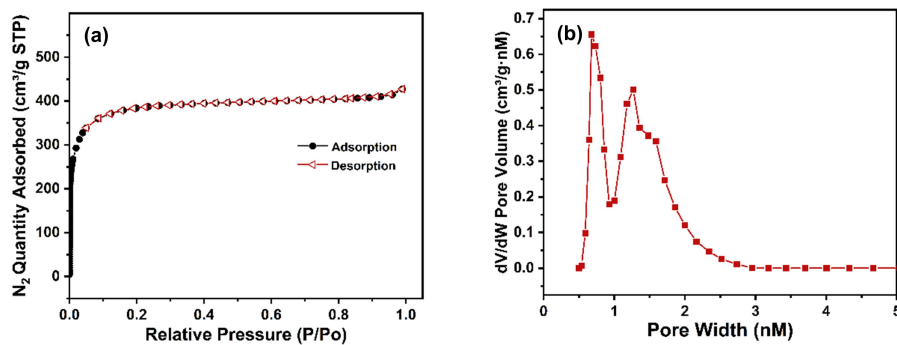

**Fig. S3** Nitrogen adsorption measurements at 77 K for UiO-66.

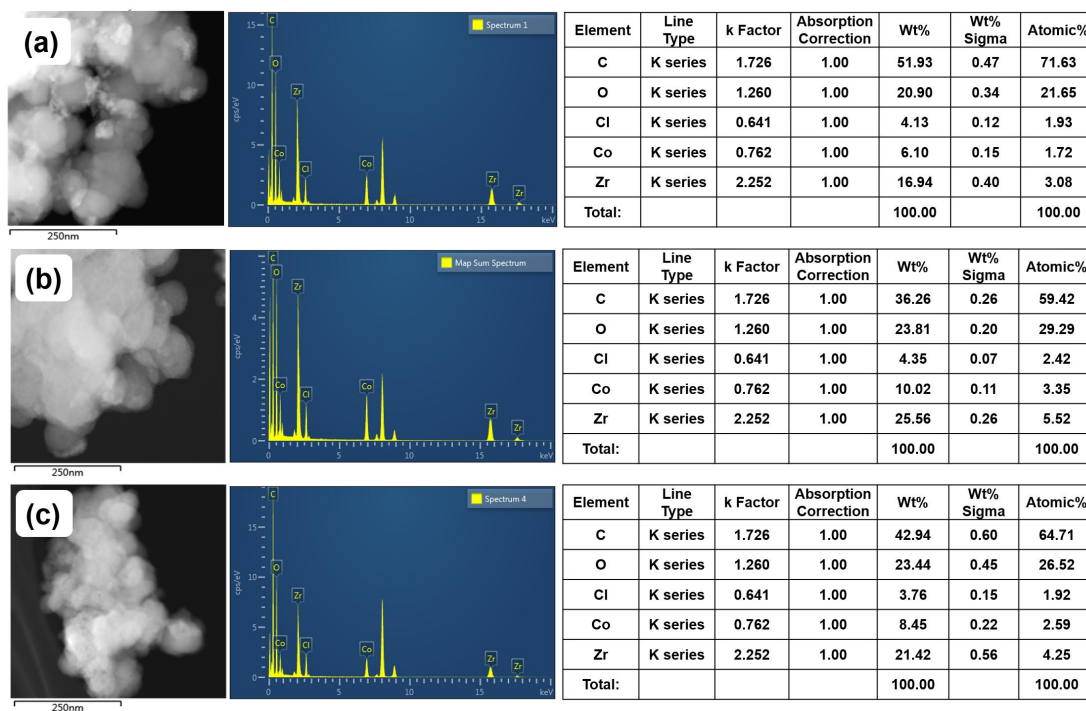

**Fig. S4** Energy dispersive X-ray (EDX) analysis of functionalized UiO-66 materials: (a) UiO-66-alkyne-Co; (b) UiO-66-(alkyne-Co)<sub>2</sub>; (c) UiO-66-(alkyne-Co)<sub>2</sub>-recycle.

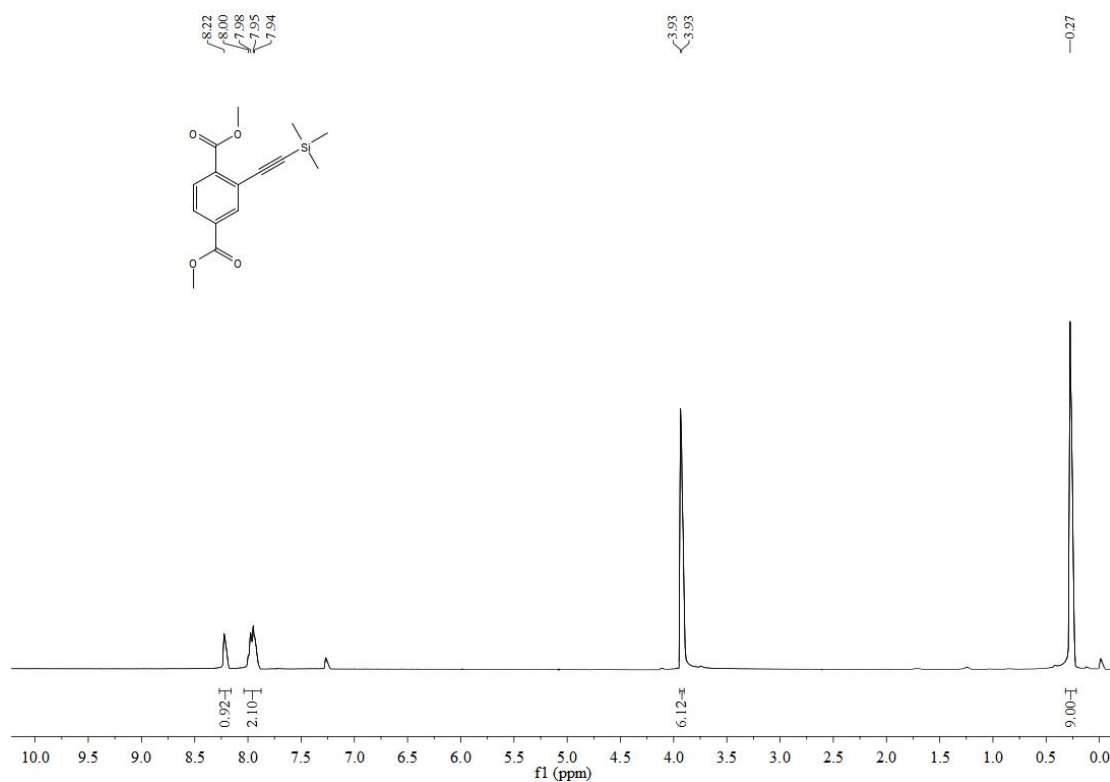

**Compound 2a 2-((trimethylsilyl)ethynyl)terephthalic acid**  $^1\text{H}$  NMR (400 MHz,  $\text{CDCl}_3$ )  $\delta$  8.22 (d,  $J$  = 18.1 Hz, 1H), 7.94 (s, 2H), 3.92 (d,  $J$  = 14.4 Hz, 6H), 0.32 – 0.22 (m, 9H).

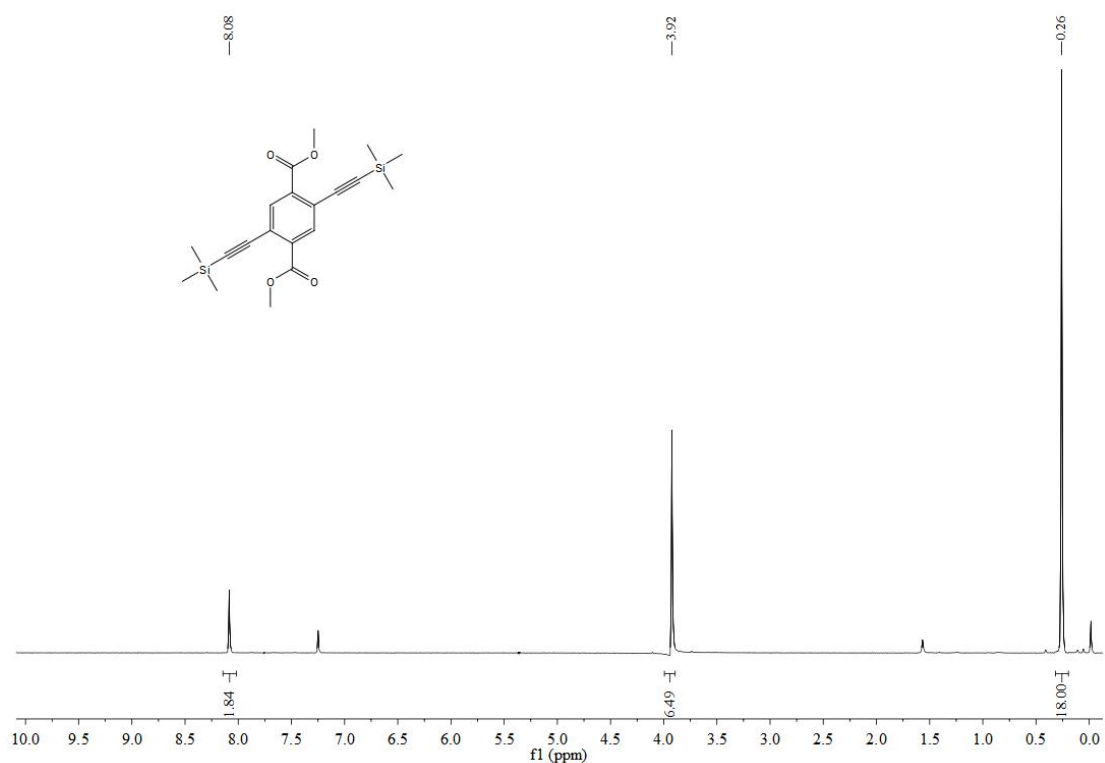

**Compound 2b (dimethyl 2,5-bis((trimethylsilyl)ethynyl)terephthalate)**  $^1\text{H}$  NMR (400 MHz,  $\text{CDCl}_3$ )  $\delta$  8.08 (s, 2H), 3.92 (s, 6H), 0.26 (s, 18H).

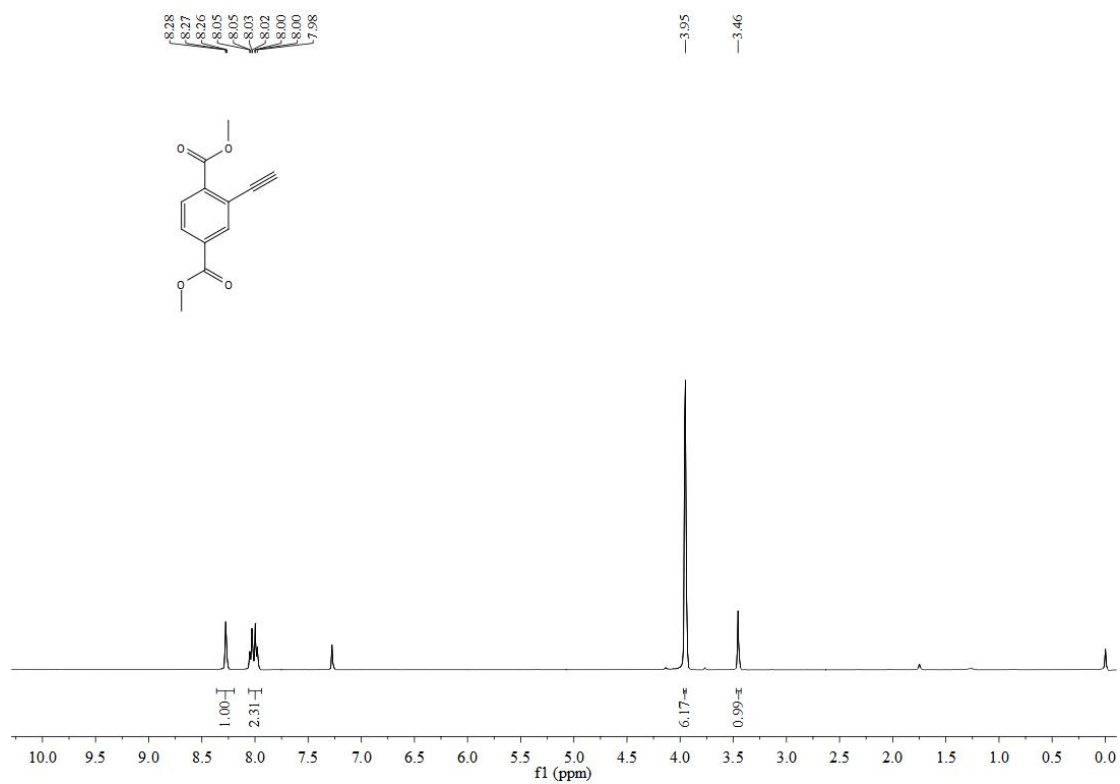

**Compound 3a dimethyl 2-ethynylterephthalate**  $^1\text{H NMR}$  (400 MHz,  $\text{CDCl}_3$ )  $\delta$  8.26 (d,  $J = 9.5$  Hz, 1H), 7.98 (s, 2H), 3.95 (s, 6H), 3.46 (s, 1H).

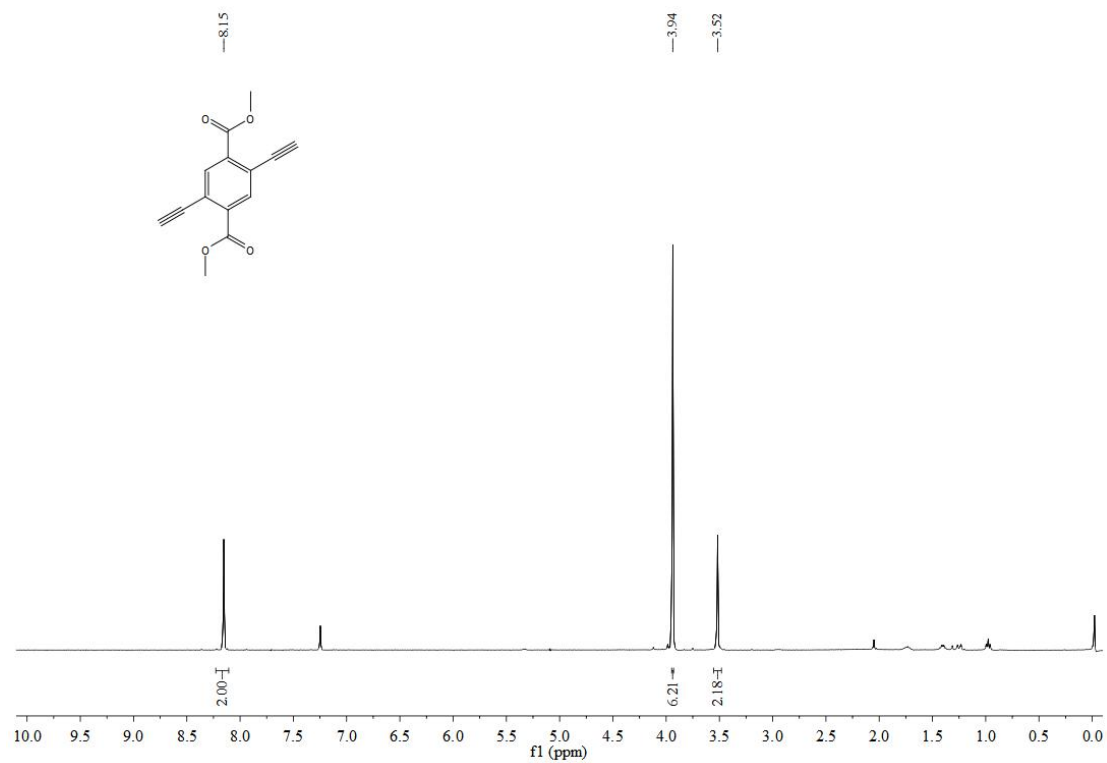

**Compound 3b (dimethyl 2,5-diethynylterephthalate)**  $^1\text{H NMR}$  (400 MHz,  $\text{CDCl}_3$ )  $\delta$  8.15 (s, 2H), 3.94 (s, 6H), 3.52 (s, 2H).

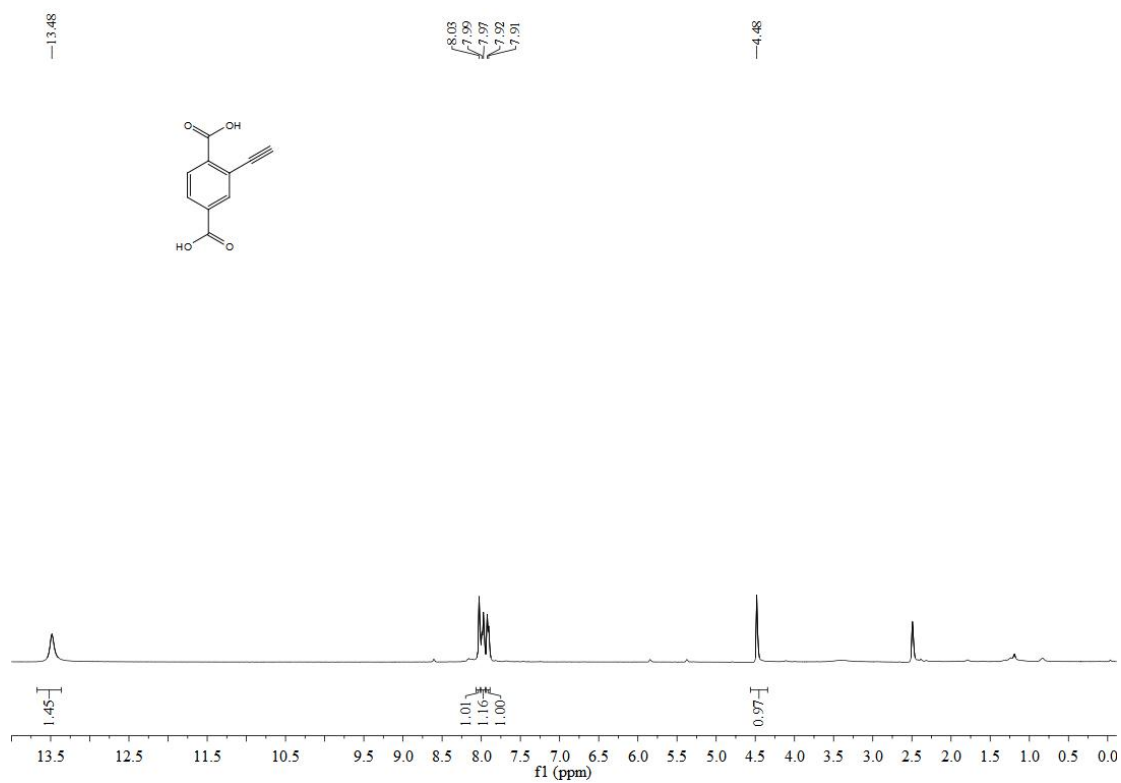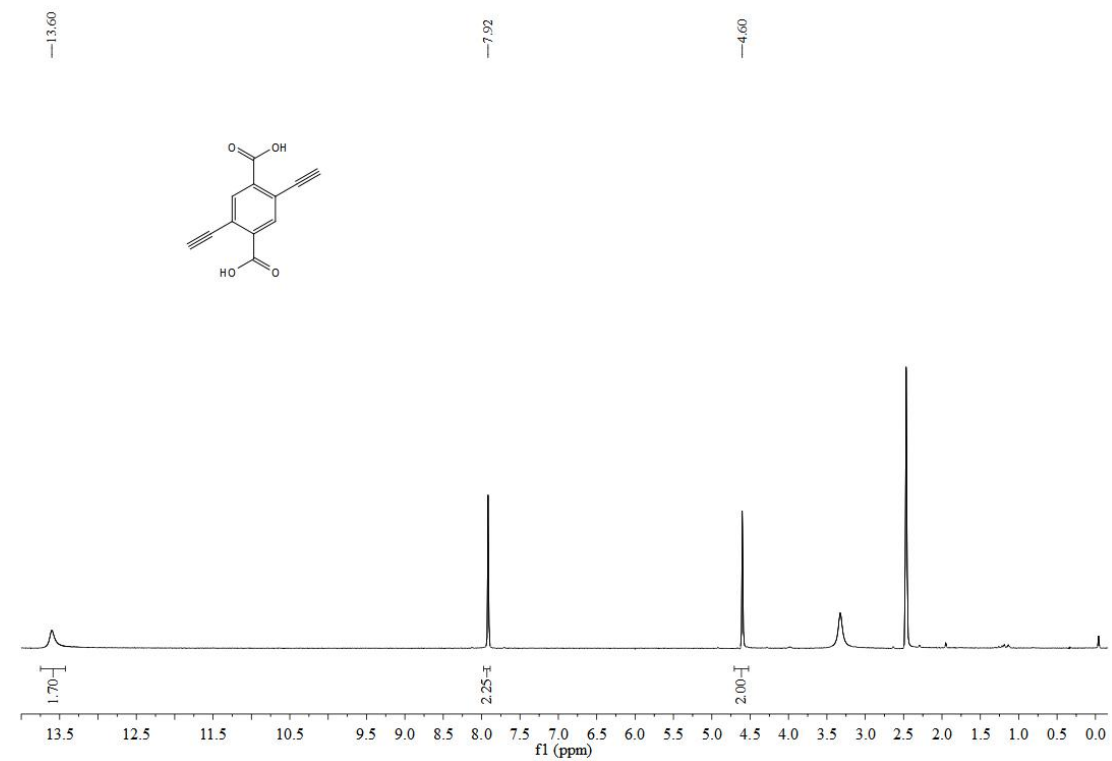

**Compound 4b (2,5-diethynylterephthalic acid)**  $^1\text{H NMR}$  (400 MHz,  $\text{DMSO-}d_6$ )  $\delta$  13.60 (s, 2H), 7.92 (s, 2H), 4.60 (s, 2H).

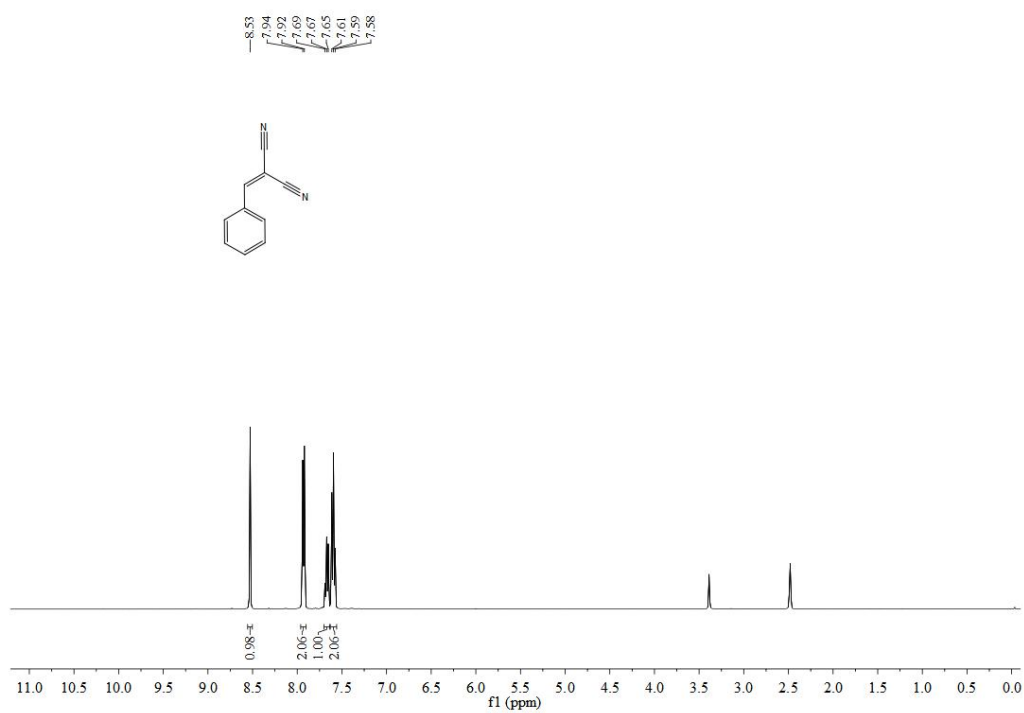

**2-benzylidenemalononitrile** <sup>1</sup>H NMR (400 MHz, DMSO-*d*<sub>6</sub>) δ 8.53 (s, 1H), 7.93 (d, *J* = 7.4 Hz, 2H), 7.67 (t, *J* = 7.4 Hz, 1H), 7.59 (t, *J* = 7.5 Hz, 2H).

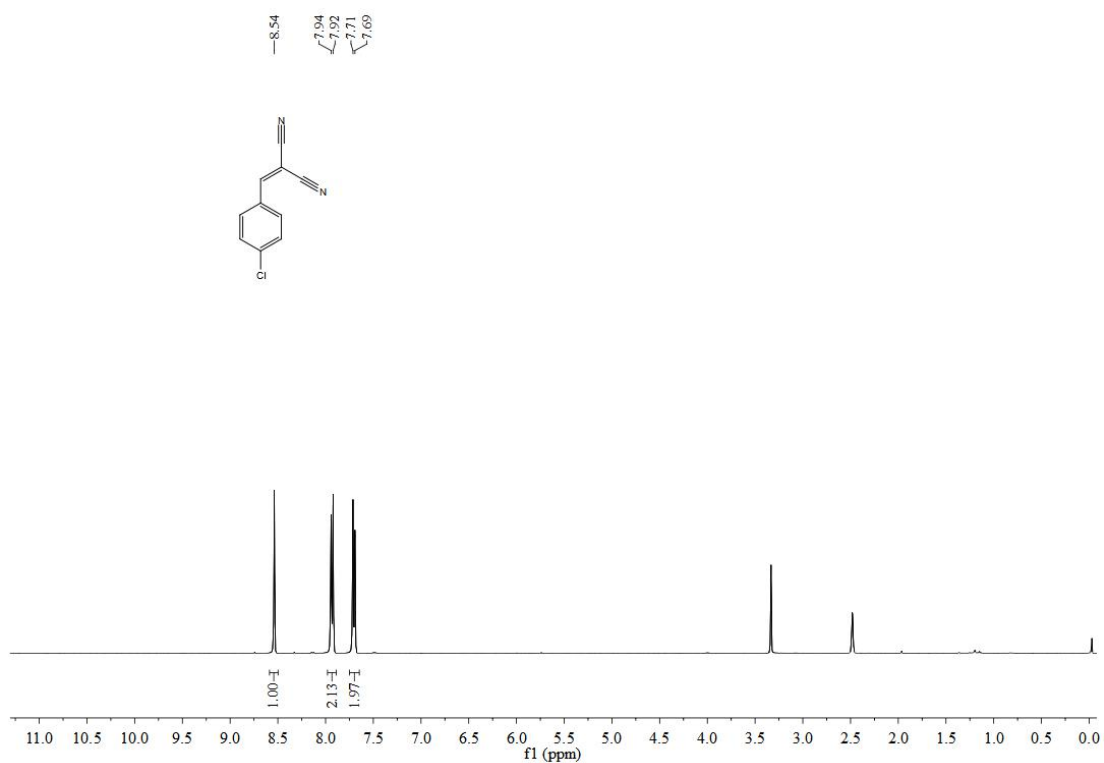

**2-(4-chlorobenzylidene)malononitrile** <sup>1</sup>H NMR (400 MHz, DMSO-*d*<sub>6</sub>) δ 8.54 (s, 1H), 7.93 (d, *J* = 8.4 Hz, 2H), 7.70 (d, *J* = 8.1 Hz, 2H).

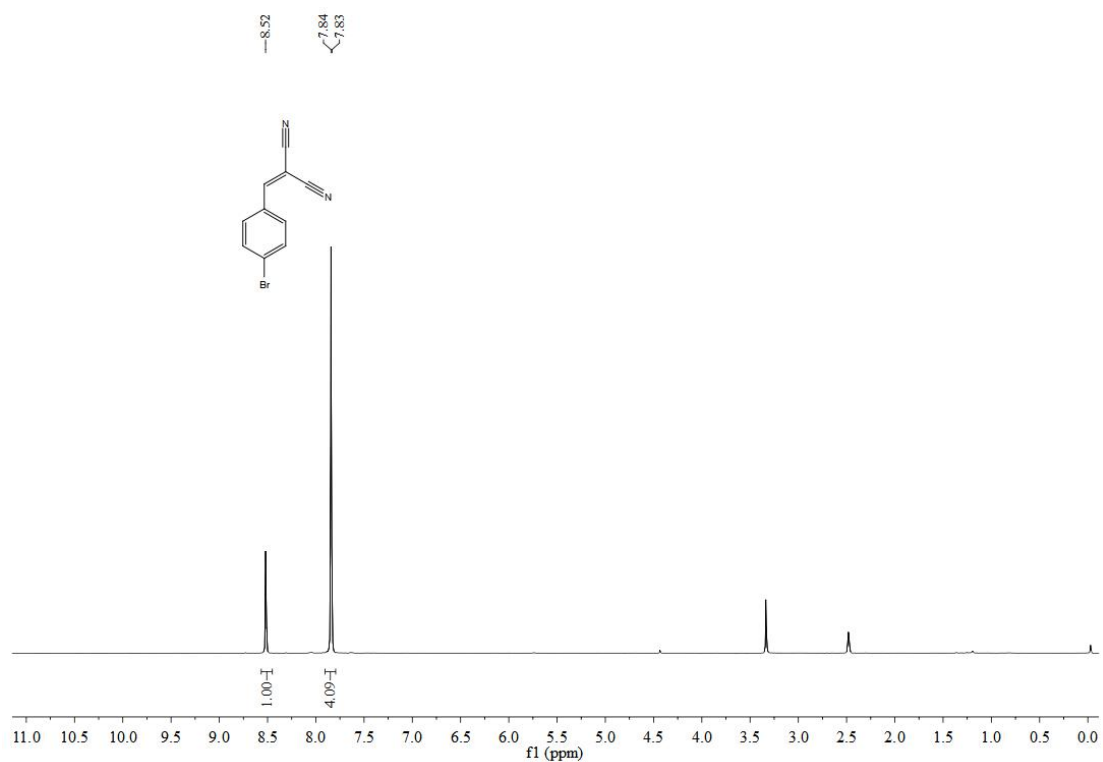

**2-(4-bromobenzylidene)malononitrile**  $^1\text{H NMR}$  (400 MHz,  $\text{DMSO-}d_6$ )  $\delta$  8.54 (s, 1H), 7.93 (d,  $J = 8.4$  Hz, 2H), 7.70 (d,  $J = 8.1$  Hz, 2H).

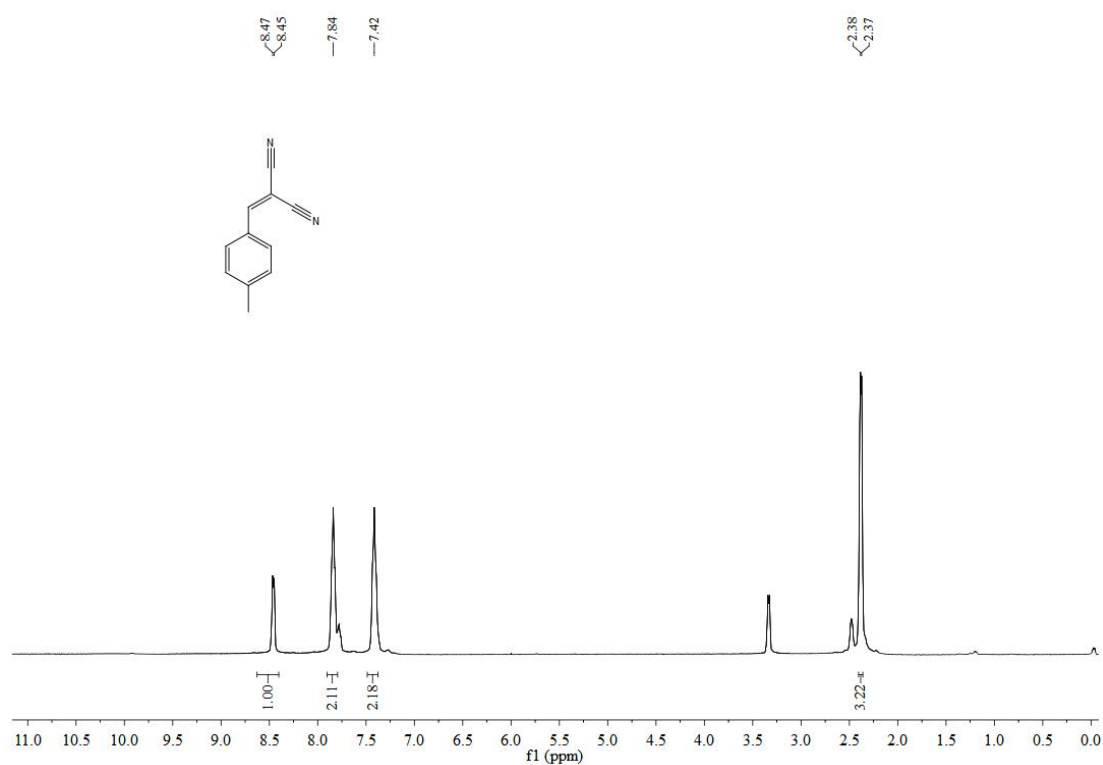

**2-(4-methylbenzylidene)malononitrile**  $^1\text{H NMR}$  (400 MHz,  $\text{DMSO-}d_6$ )  $\delta$  8.46 (d,  $J = 6.4$  Hz, 1H), 7.84 (s, 2H), 7.42 (s, 2H), 2.38 (d,  $J = 4.5$  Hz, 3H), 2.37 (d,  $J = 4.5$  Hz, 3H).



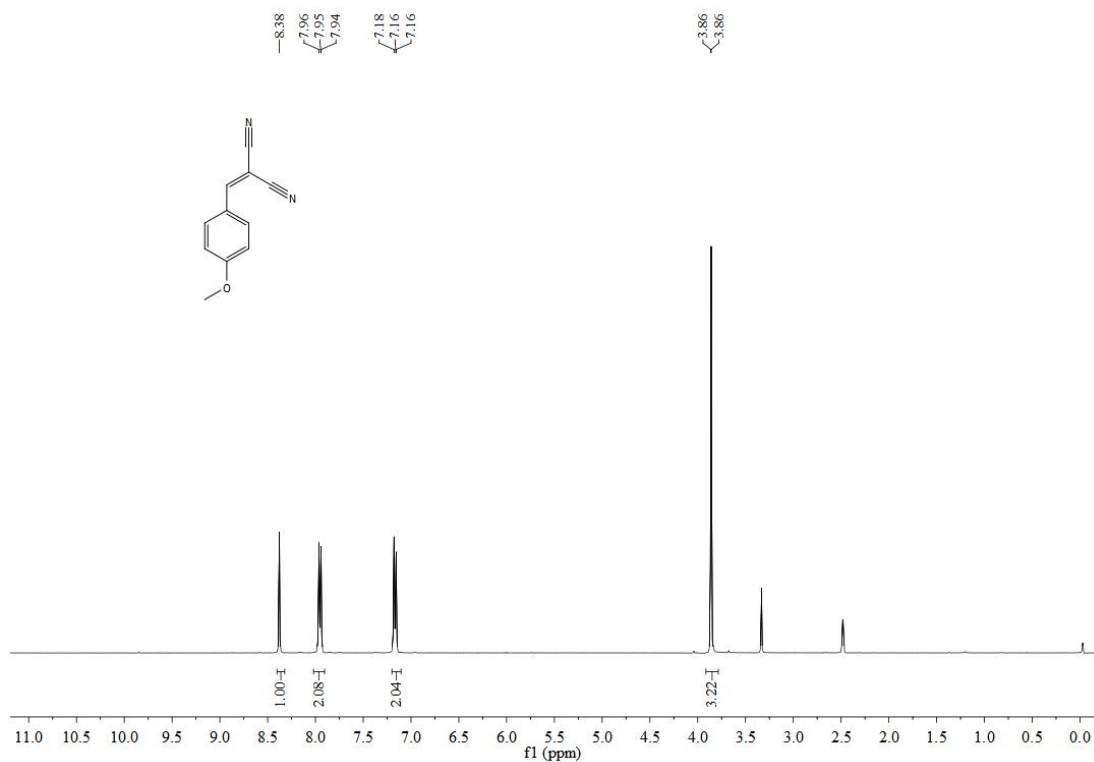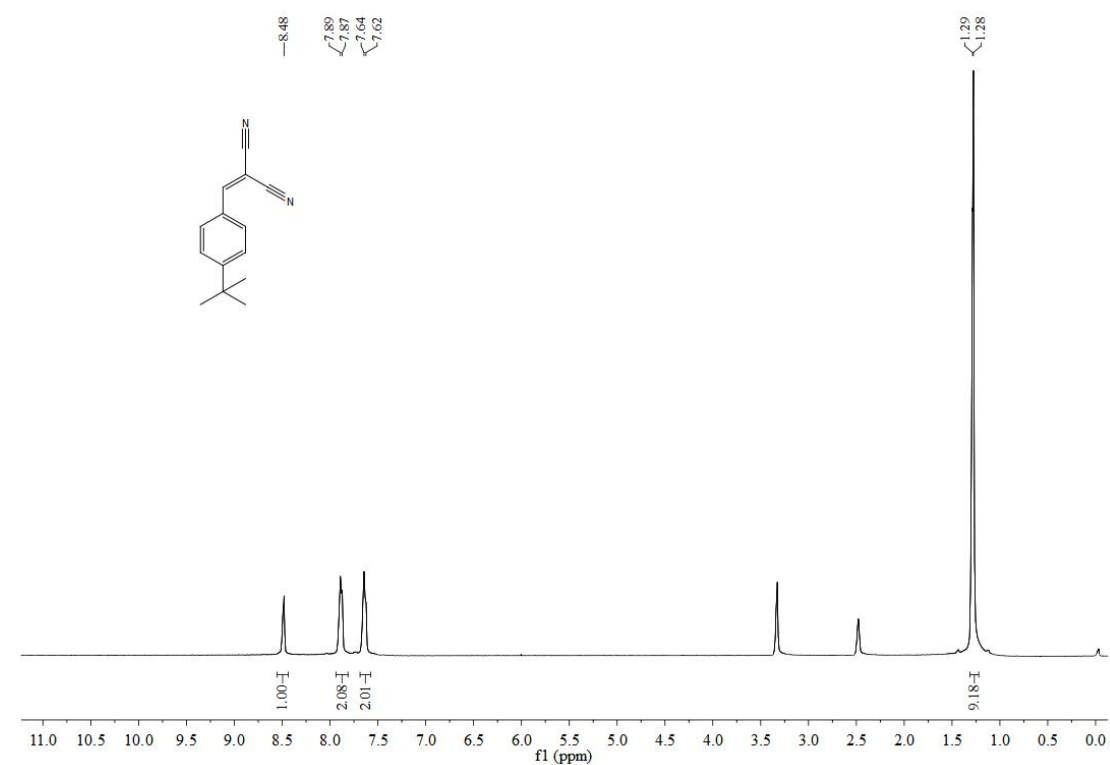

**2-(4-(tert-butyl)benzylidene)malononitrile**  $^1\text{H NMR}$  (400 MHz,  $\text{DMSO-}d_6$ )  $\delta$  8.48 (s, 1H), 7.88 (d,  $J = 7.9$  Hz, 2H), 7.63 (d,  $J = 8.1$  Hz, 2H), 1.28 (d,  $J = 3.7$  Hz, 9H).

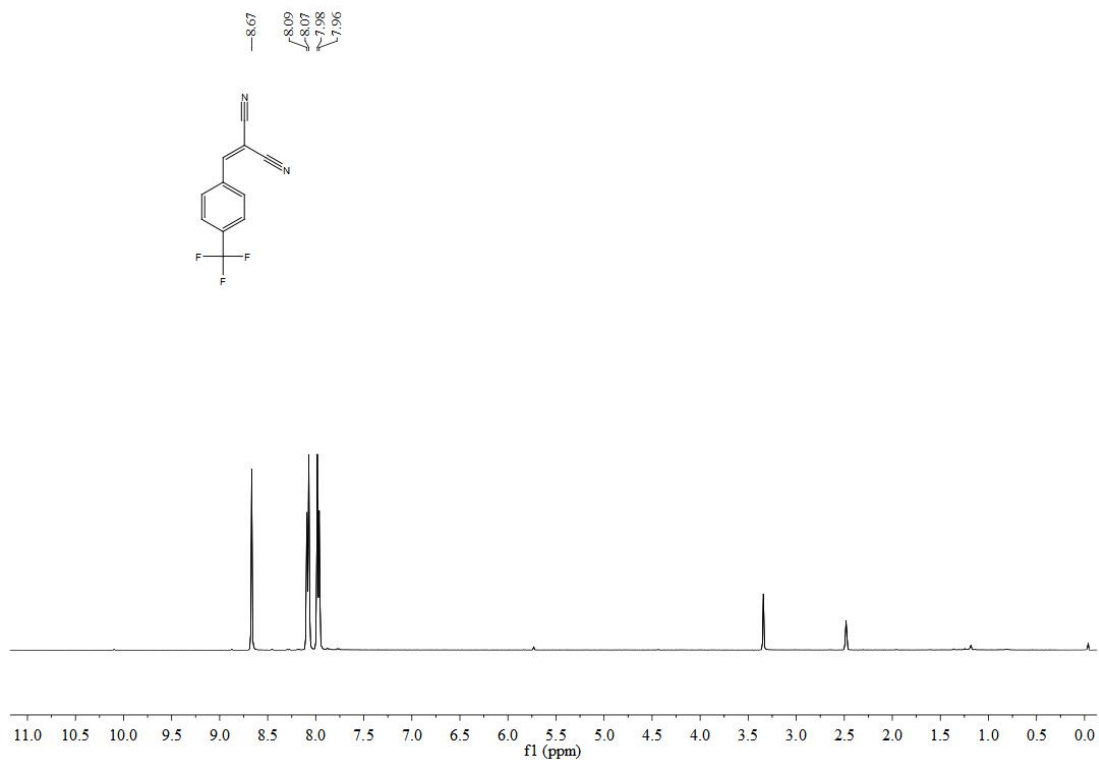

**2-(4-(trifluoromethyl)benzylidene)malononitrile**  $^1\text{H NMR}$  (400 MHz,  $\text{DMSO-}d_6$ )  $\delta$  8.67 (s, 1H), 8.08 (d,  $J = 8.0$  Hz, 2H), 7.97 (d,  $J = 8.0$  Hz, 2H).

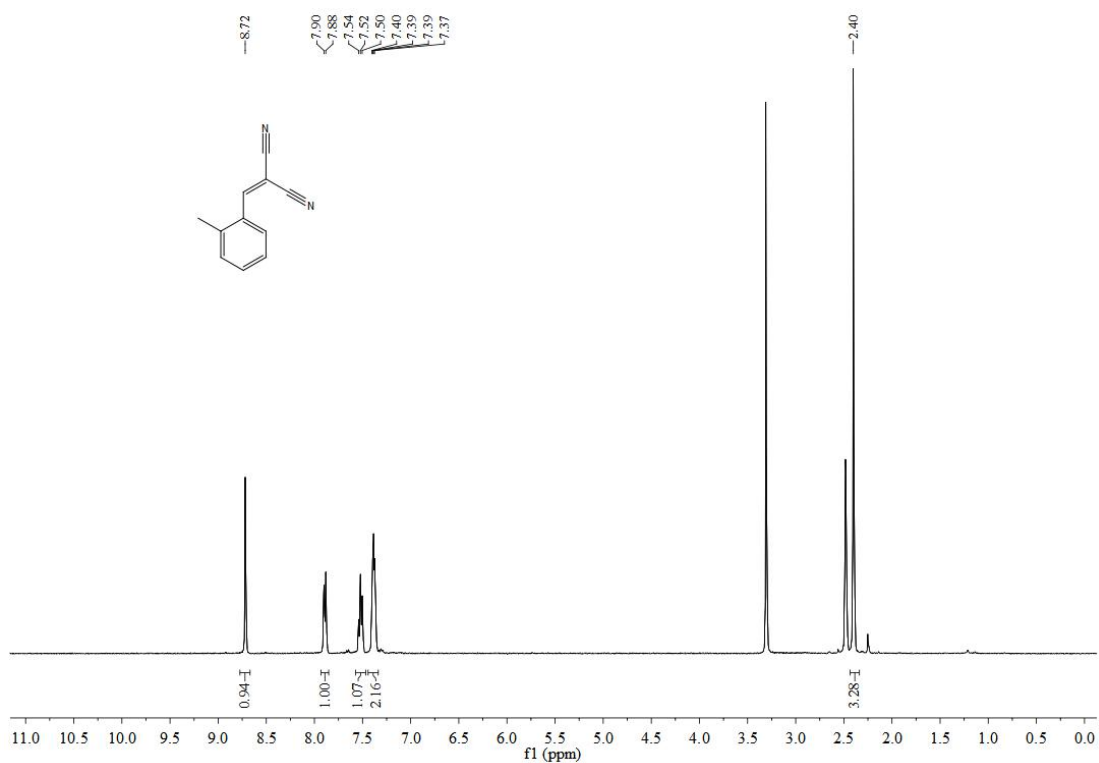

**2-(2-methylbenzylidene)malononitrile**  $^1\text{H NMR}$  (400 MHz,  $\text{DMSO-}d_6$ )  $\delta$  8.72 (s, 1H), 7.89 (d,  $J = 7.7$  Hz, 1H), 7.52 (t,  $J = 7.5$  Hz, 1H), 7.39 (dd,  $J = 7.1, 4.3$  Hz, 2H), 2.40 (s, 3H).

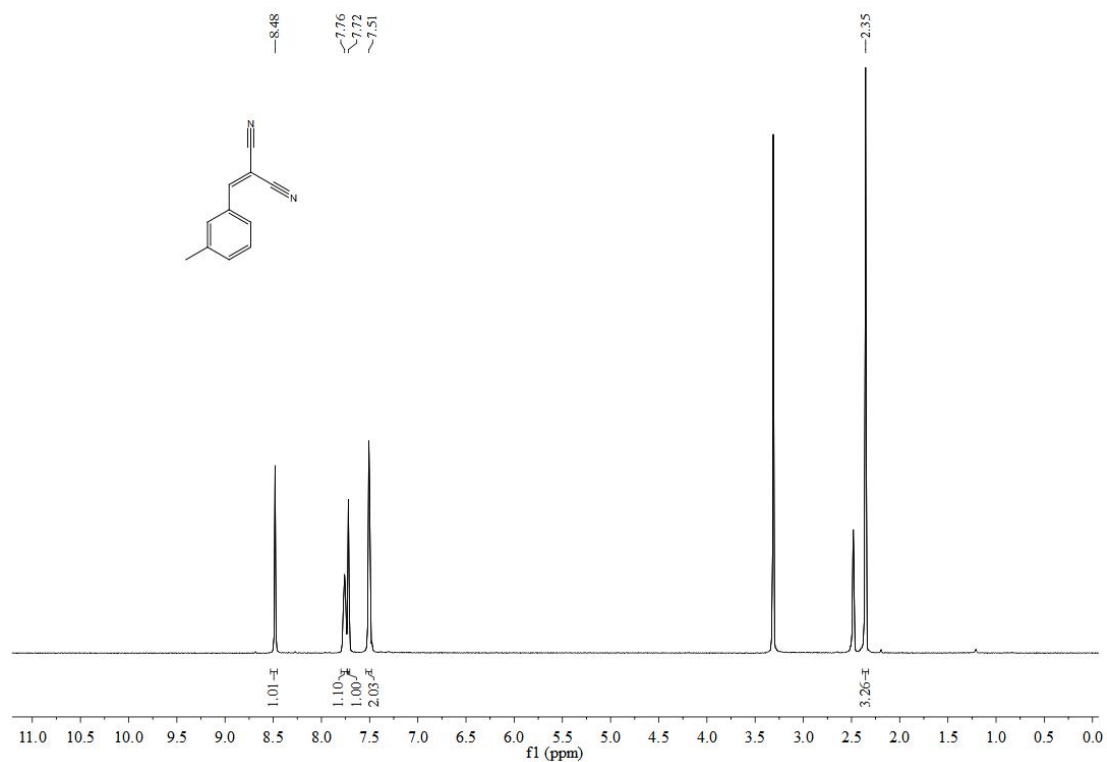

**2-(3-methylbenzylidene)malononitrile** <sup>1</sup>H NMR (400 MHz, DMSO-*d*<sub>6</sub>) δ 8.48 (s, 1H), 7.76 (s, 1H), 7.72 (s, 1H), 7.51 (s, 2H), 2.35 (s, 3H).

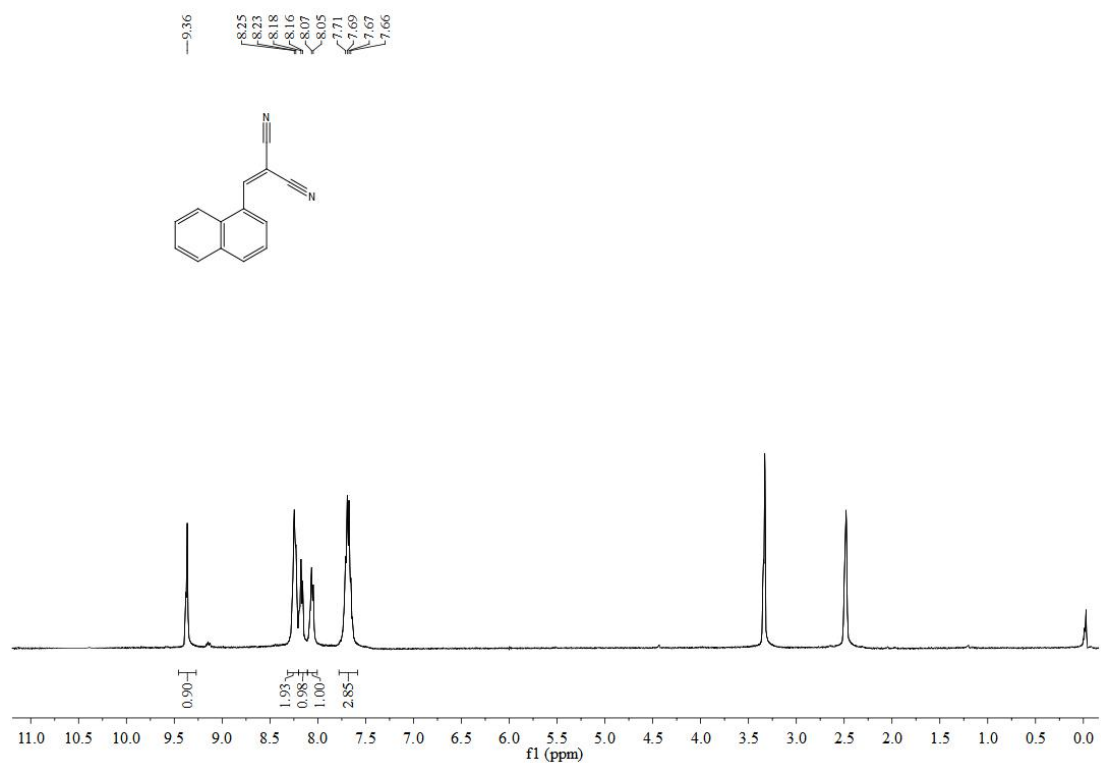

**2-(naphthalen-1-ylmethylene)malononitrile** <sup>1</sup>H NMR (400 MHz, DMSO-*d*<sub>6</sub>) δ 9.36 (s, 1H), 8.24 (d, *J* = 6.6 Hz, 2H), 8.17 (d, *J* = 7.3 Hz, 1H), 8.06 (d, *J* = 7.0 Hz, 1H), 7.68 (dd, *J* = 14.7, 7.4 Hz, 3H).

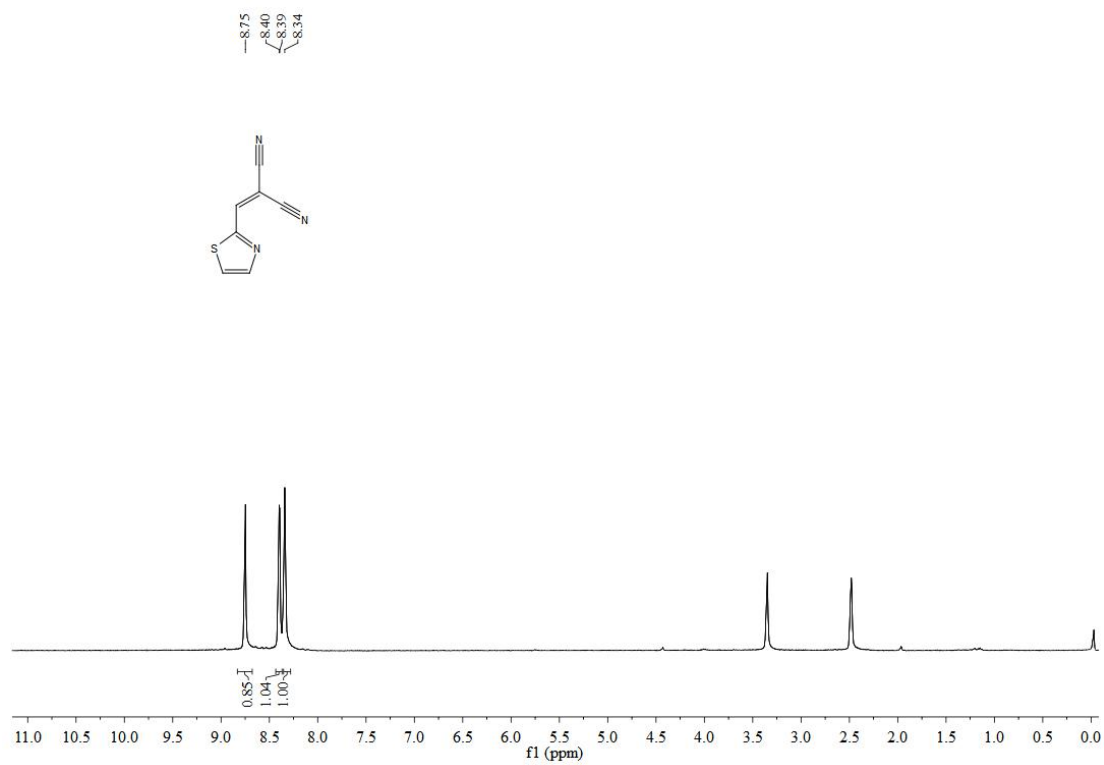

**2-(thiazol-2-ylmethylene)malononitrile**  $^1\text{H}$  NMR (400 MHz,  $\text{DMSO-}d_6$ )  $\delta$  8.75 (s, 1H), 8.40 (d,  $J=2.6$  Hz, 1H), 8.34 (s, 1H).
